# Supplementary material for: "EDML1": a chronology for the EPICA deep ice core from Dronning Maud Land, Antarctica, over the last 150 000 years
Source: Copernicus journal article supplement (doi:10.5194/cp-3-475-2007), 2007-08-07
Supplement: Supplementary file 1 [file cp-3-475-2007-supplement.zip]

## Supplementary Figure S1:

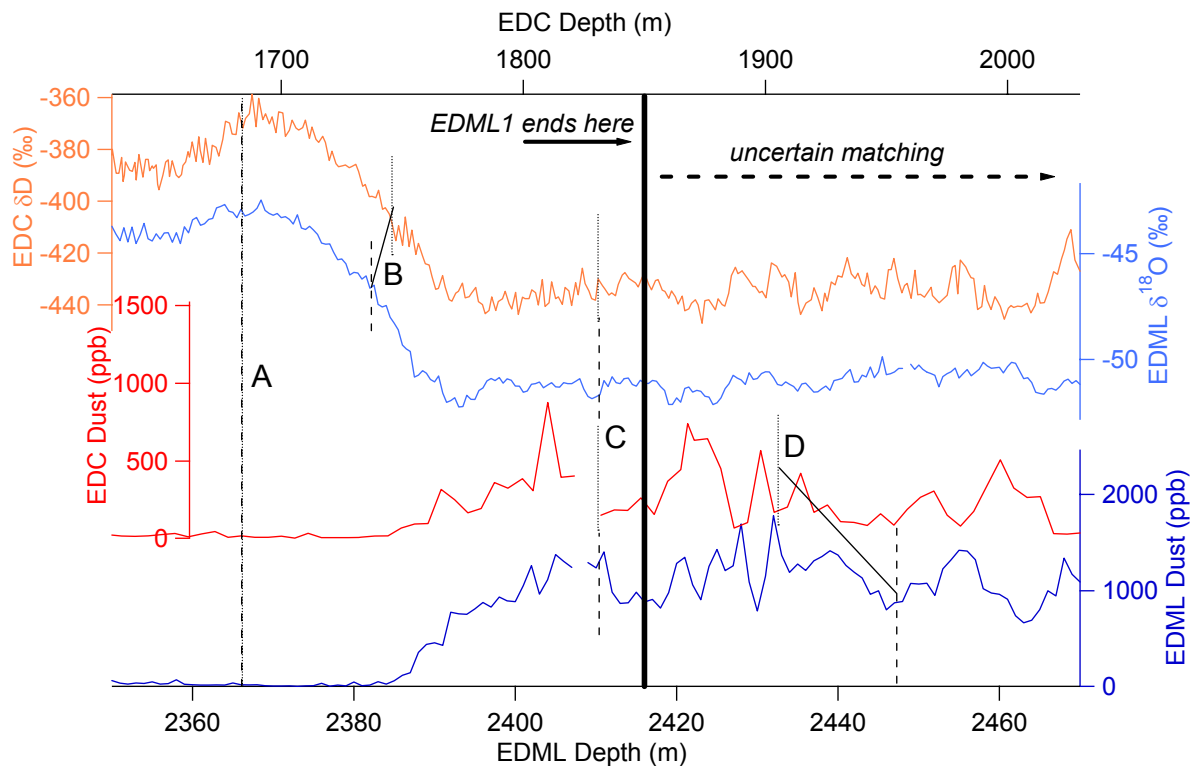

**Figure S1:** Illustration of the EDML-EDC matches (labelled “A” – “D”) in the bottom meters of the *EDML1* chronology. Water stable isotopes and dust concentrations are shown for EDML and EDC on their own depth-scales. The depth axes are aligned at “A” and “C”. Indicated are horizons in EDML (dashed lines) that were matched to horizons in EDC (dotted lines). “A” is the last volcanic match. Matches “B” – “D” get increasingly uncertain, and *EDML1* ends at 2416 m depth, corresponding to 150 ka BP.
